# Supplementary material for: Comparative Mitogenomic Analysis of Five Awl Skippers (Lepidoptera: Hesperiidae: Coeliadinae) and Their Phylogenetic Implications
Source: MDPI journal article supplement (doi:10.3390/insects12080757), 2021-08-23
Supplement: s1 [file s1]

Supplementary Materials

Comparative Mitogenomic Analysis of Five Awl Skippers (Lepidoptera: Hesperiidae: Coeliadinae) and Their Phylogenetic Implications

Qi Sun <sup>1,4</sup>, Yumeng Yang <sup>2,4</sup>, Xiangyu Hao <sup>1,4</sup>, Jintian Xiao <sup>3,4</sup>, Jiaqi Liu <sup>3,4</sup> and Xiangqun Yuan <sup>3,\*</sup>

<sup>1</sup> College of Life Sciences, Northwest A&F University, Yangling 712100, China; qsun@nwafu.edu.cn (Q. S.); xyhao@nwafu.edn.cn (X. H.)  
<sup>2</sup> College of Natural Resources and Environment, Northwest A&F University, Yangling 712100, China; Yangyumeng@mwafu.edu.cn (Y. Y.)  
<sup>3</sup> Key Laboratory of Plant Protection Resources and Pest Management, Ministry of Education; College of Plant Protection, Northwest A&F University, Yangling 712100, China; xjt0629@nwafu.edu.cn (J. X.); jiaq\_work@163.com (J. L.)  
<sup>4</sup> These authors contributed equally to this article.  
\*\* Correspondence: yuanxq@nwsuaf.edu.cn; Tel.: +86-1375-998-5152

Table S1. Nucleotide composition and skewness of different elements of mitogenomes of *H. schoenherr*, *B. miracula*, *B. oedipodea*, *B. harisa* and *B. exclamationis*.

| Regions                                                                                                      | Size (bp)                         | T(U)%                        | C%                               | A%                           | G%                                         | A+T%                         | AT skew                                | GC skew                                |
|--------------------------------------------------------------------------------------------------------------|-----------------------------------|------------------------------|----------------------------------|------------------------------|--------------------------------------------|------------------------------|----------------------------------------|----------------------------------------|
| <i>H. schoenherr</i> / <i>B. miracula</i> / <i>B. oedipodea</i> / <i>B. harisa</i> / <i>B. exclamationis</i> |                                   |                              |                                  |                              |                                            |                              |                                        |                                        |
| PCGs                                                                                                         | 11196/11205/11193/<br>11187/11199 | 45.2/46.1/45.7/<br>45.4/45.6 | 10.7/10.3/10.6/10.<br>6/10.2     | 33.0/33.3/33.0/<br>33.3/33.1 | 11.1/10.4/10.8/10.<br>7/11.0               | 78.2/79.4/78.7/<br>78.7/78.7 | -0.156/-0.161/-0.161/-<br>0.154/-0.159 | 0.021/0.005/0.010/0.00<br>3/0.039      |
| 1st codon<br>position                                                                                        | 3732/3735/3731/372<br>9/3733      | 37.1/37.9/37.1/<br>37.2/37.7 | 10.4/10.2/10.6/10.<br>5/9.9      | 36.0/36.6/36.0/<br>36.4/35.9 | 16.6/15.3/16.3/15.<br>9/16.4               | 73.1/74.5/73.1/<br>73.6/73.6 | -0.015/-0.018/-0.016/-<br>0.010/-0.025 | 0.227/0.200/0.215/0.20<br>7/0.247      |
| 2nd codon<br>position                                                                                        | 3732/3735/3731/372<br>9/3733      | 47.8/48.3/48.2/<br>48.1/48.0 | 16.6/16.5/16.7/16.<br>5/16.6     | 22.2/22.1/22.0/<br>22.2/22.1 | 13.3/13.2/13.1/13.<br>2/13.3               | 70.0/70.4/70.2/<br>70.3/70.1 | -0.365/-0.373/-0.374/-<br>0.370/-0.369 | -0.109/-0.112/-0.119/-<br>0.112/-0.112 |
| 3rd codon<br>position                                                                                        | 3732/3735/3731/372<br>9/3733      | 50.8/52.0/51.6/<br>51.0/51.2 | 5.0/4.1/4.5/4.8/4.0<br>41.3/41.4 | 40.8/41.3/41.0/<br>41.3/41.4 | 3.5/2.6/2.9/2.9/3.3<br>3.5/2.6/2.9/2.9/3.3 | 91.6/93.3/92.6/<br>92.3/92.6 | -0.108/-0.115/-0.115/-<br>0.105/-0.106 | -0.178/-0.219/-0.215/-<br>0.254/-0.094 |
| NCR                                                                                                          | 271/285/277/278/262               | 48.3/49.8/48.4/<br>48.2/47.7 | 4.8/2.8/5.1/4.0/4.6              | 44.6/46.0/44.0/<br>46.0/46.2 | 2.2/1.4/2.5/1.8/1.5                        | 92.9/95.8/92.4/<br>94.2/93.9 | -0.040/-0.040/-0.047/-<br>0.023/-0.016 | -0.368/-0.333/-0.333/-<br>0.375/-0.500 |
| <i>trn</i> As                                                                                                | 1458/1464/1468/147<br>0/1460      | 39.9/40.0/39.4/<br>40.3/40.7 | 7.8/7.9/8.0/8.1/7.7              | 41.2/41.5/41.8/<br>40.5/40.7 | 11.0/10.7/10.8/11.<br>0/10.9               | 81.1/81.5/81.2/<br>80.8/81.4 | 0.016/0.018/0.029/0.00<br>3/0.000      | 0.171/0.154/0.148/0.15<br>3/0.169      |
| rRNAs                                                                                                        | 2186/2157/2171/214<br>4/2166      | 41.1/40.9/41.3/<br>40.0/41.3 | 4.9/4.9/5.3/5.2/4.9              | 43.5/44.0/43.4/<br>44.5/43.7 | 10.6/10.2/10.0/10.<br>3/10.2               | 84.6/84.9/84.7/<br>84.5/85.0 | 0.028/0.036/0.024/0.05<br>3/0.028      | 0.367/0.354/0.313/0.33<br>1/0.350      |
| Full<br>genome                                                                                               | 15340/15295/15304/<br>15295/15289 | 40.7/41.0/40.7/<br>40.9/40.9 | 12.2/11.7/12.0/12.<br>1/11.8     | 39.3/39.8/39.5/<br>39.4/39.5 | 7.8/7.4/7.7/7.7/7.8                        | 80.0/80.8/80.2/<br>80.3/80.4 | -0.018/-0.015/-0.016/-<br>0.019/-0.018 | -0.219/-0.221/-0.220/-<br>0.223/-0.203 |

**Table S2.** Mitogenomic organization of *H. schoenherr*, *B. miracula*, *B. oedipodea*, *B. harisa* and *B. exclamationis*.

| Gene                                                              | Position                 |                          | Size                     | Intergenic nucleotides | Codon               |                     | Strand |
|-------------------------------------------------------------------|--------------------------|--------------------------|--------------------------|------------------------|---------------------|---------------------|--------|
|                                                                   | From                     | To                       |                          |                        | Start               | Stop                |        |
| H. schoenherr/B. miracula/B. oedipodea/B. harisa/B. exclamationis |                          |                          |                          |                        |                     |                     |        |
| trnM                                                              | 1/1/1/1                  | 68/68/69/69/68           | 68/68/69/69/68           |                        |                     |                     | J      |
| trnI                                                              | 69/69/72/70/71           | 132/135/137/137/135      | 64/67/66/68/65           | -/-2/-/2               |                     |                     | J      |
| trnQ                                                              | 130/137/138/146/133      | 198/205/206/214/201      | 69/69/69/69/69           | -3/1/-/8/-3            |                     |                     | N      |
| nad2                                                              | 290/310/297/301/310      | 1303/1323/1310/1314/1323 | 1014/1014/1014/1014/1014 | 91/104/90/86/108       | ATT/ATT/ATT/ATT/ATT | TAA/TAA/TAA/TAG/TAA | J      |
| trnW                                                              | 1302/1322/1309/1328/1322 | 1368/1388/1375/1394/1389 | 67/67/67/67/68           | -2/-2/-2/13/-2         |                     |                     | J      |
| trnC                                                              | 1361/1381/1368/1387/1382 | 1426/1449/1433/1451/1446 | 66/69/66/65/65           | -8/-8/-8/-8/-8         |                     |                     | N      |
| trnY                                                              | 1428/1468/1449/1466/1449 | 1494/1532/1514/1533/1515 | 67/65/66/68/67           | 1/18/15/14/2           |                     |                     | N      |
| cox1                                                              | 1497/1530/1521/1538/1530 | 3027/3066/3051/3068/3060 | 1531/1537/1531/1531/1531 | 2/-3/6/4/14            | CGA/ATT/CGA/CGA/CGA | T/T/T/T/T           | J      |
| trnL2                                                             | 3028/3067/3052/3069/3061 | 3094/3133/3118/3135/3127 | 67/67/67/67/67           |                        |                     |                     | J      |
| cox2                                                              | 3095/3136/3120/3136/3128 | 3776/3817/3801/3817/3809 | 682/682/682/682/682      | -/2/1/-/-              | ATG/ATG/ATG/ATG/ATG | T/T/T/T/T           | J      |
| trnK                                                              | 3777/3818/3802/3818/3810 | 3847/3888/3872/3888/3880 | 71/71/71/71/71           |                        |                     |                     | J      |
| trnD                                                              | 3852/3894/3877/3894/3893 | 3917/3965/3943/3960/3959 | 66/72/67/67/67           | 4/5/4/5/12             |                     |                     | J      |
| atp8                                                              | 3918/3966/3944/3961/3960 | 4094/4127/4108/4125/4127 | 177/162/165/165/168      |                        | ATC/ATT/ATT/ATT/ATT | TAA/TAA/TAA/TAA/TAA | J      |
| atp6                                                              | 4088/4121/4102/4119/4121 | 4765/4798/4779/4796/4798 | 678/678/678/678/678      | -7/-7/-7/-7/-7         | ATG/ATG/ATG/ATG/ATG | TAA/TAA/TAA/TAA/TAA | J      |
| cox3                                                              | 4803/4798/4786/4811/4815 | 5588/5601/5583/5599/5600 | 786/804/798/789/786      | 37/-1/6/14/16          | ATG/ATA/ATT/ATG/ATG | TAA/TAA/TAA/TAA/TAA | J      |
| trnG                                                              | 5591/5605/5586/5602/5603 | 5658/5672/5653/5667/5668 | 68/68/68/66/66           | 2/3/2/2/2              |                     |                     | J      |
| nad3                                                              | 5659/5673/5654/5668/5669 | 6012/6026/6007/6021/6022 | 354/354/354/354/354      |                        | ATT/ATT/ATT/ATT/ATT | TAA/TAG/TAG/TAA/TAA | J      |
| trnA                                                              | 6016/6025/6006/6024/6025 | 6079/6089/6072/6088/6089 | 64/65/67/65/65           | 3/-2/-2/2/2            |                     |                     | J      |
| trnR                                                              | 6080/6091/6075/6088/6090 | 6142/6154/6138/6155/6153 | 63/64/64/68/64           | -/1/2/-1/-             |                     |                     | J      |
| trnN                                                              | 6162/6168/6146/6156/6154 | 6227/6233/6211/6221/6219 | 66/66/66/66/66           | 19/13/7/-/-            |                     |                     | J      |
| trnS1                                                             | 6237/6242/6226/6238/6233 | 6297/6302/6286/6298/6290 | 61/61/61/61/58           | 9/8/14/16/13           |                     |                     | J      |
| trnE                                                              | 6316/6350/6321/6335/6322 | 6381/6415/6386/6402/6388 | 66/66/66/68/67           | 18/47/34/36/31         |                     |                     | J      |

| Gene         | Position                      |                               | Size                     | Intergenic<br>nucleotides | Codon               |                     | Strand |
|--------------|-------------------------------|-------------------------------|--------------------------|---------------------------|---------------------|---------------------|--------|
|              | From                          | To                            |                          |                           | Start               | Stop                |        |
| <i>trnF</i>  | 6422/6414/6404/6401/6391      | 6487/6477/6470/6469/6457      | 66/64/67/69/67           | 40/-2/17/-2/2             |                     |                     | N      |
| <i>nad5</i>  | 6495/6478/6472/6471/6458      | 8232/8215/8209/8205/8200      | 1738/1738/1738/1735/1743 | 7/-1/1/-                  | ATT/ATT/ATT/ATT/ATT | T/T/T/T/TAA         | N      |
| <i>trnH</i>  | 8233/8216/8210/8206/8198      | 8299/8281/8276/8271/8263      | 67/66/67/66/66           | -/-/-/-3                  |                     |                     | N      |
| <i>nad4</i>  | 8300/8282/8277/8272/8264      | 9635/9617/9612/9607/9599      | 1336/1336/1336/1336/1336 |                           | ATG/ATG/ATG/ATG/ATG | T/T/T/T/T           | N      |
| <i>nad4L</i> | 9636/9618/9612/9608/9600      | 9920/9902/9896/9892/9884      | 285/285/285/285/285      | -/-1/-/-                  | ATG/ATG/ATG/ATG/ATG | TAA/TAA/TAA/TAA/TAA | N      |
| <i>trnT</i>  | 9926/9908/9900/9897/9901      | 9991/9973/9965/9961/9966      | 66/66/66/65/66           | 5/5/3/4/16                |                     |                     | J      |
| <i>trnP</i>  | 9992/9974/9966/9962/9967      | 10057/10039/10031/10027/10032 | 66/66/66/66/66           |                           |                     |                     | N      |
| <i>nad6</i>  | 10060/10042/10034/10030/10035 | 10593/10575/10564/10560/10568 | 534/534/531/531/534      | 2/2/2/2/2                 | ATT/ATT/ATT/ATC/ATT | TAA/TAA/TAA/TAA/TAA | J      |
| <i>cytb</i>  | 10597/10575/10568/10588/10572 | 11742/11720/11713/11736/11723 | 1146/1146/1146/1149/1152 | 3/-1/3/27/3               | ATG/ATG/ATG/ATG/ATG | TAA/TAA/TAA/TAA/TAA | J      |
| <i>trnS2</i> | 11747/11720/11718/11735/11722 | 11811/11785/11783/11799/11788 | 65/66/66/65/67           | 4/-1/4/-2/-2              |                     |                     | J      |
| <i>nad1</i>  | 11829/11803/11801/11817/11806 | 12767/12741/12739/12758/12744 | 939/939/939/942/939      | 17/17/17/17/17            | ATG/ATG/ATG/ATG/ATG | TAA/TAA/TAA/TAA/TAA | N      |
| <i>trnL1</i> | 12769/12743/12741/12760/12746 | 12836/12809/12808/12827/12814 | 68/67/68/68/69           | 1/1/1/1/1                 |                     |                     | N      |
| <i>rrnL</i>  | 12816/12789/12788/12807/12796 | 14218/14156/14154/14173/14189 | 1403/1368/1367/1367/1394 | -21/-21/-21/-21/-19       |                     |                     | N      |
| <i>trnV</i>  | 14220/14158/14156/14175/14190 | 14286/14221/14223/14240/14255 | 67/64/68/66/66           | 1/1/1/1/-                 |                     |                     | N      |
| <i>rrnS</i>  | 14287/14222/14224/14241/14256 | 15069/15010/15027/15017/15027 | 783/789/804/777/772      |                           |                     |                     | N      |
| NCR          | 15070/15011/15028/15018/15028 | 15340/15295/15304/15295/15289 | 271/285/277/278/262      |                           |                     |                     | J      |

**Table S3.** Best partitioning schemes and models based on different datasets for BI analysis.

| Dataset | Partitioning scheme                                                                                   | Models  |
|---------|-------------------------------------------------------------------------------------------------------|---------|
| PCGs    | P1: ( <i>cytb_pos1, cox3_pos1, atp6_pos1</i> )                                                        | GTR+I+G |
|         | P2: ( <i>cox1_pos2, cox3_pos2, cytb_pos2, cox2_pos2, atp6_pos2</i> )                                  | GTR+I+G |
|         | P3: ( <i>cox3_pos3, nad3_pos3, nad6_pos3, cytb_pos3, cox2_pos3, atp6_pos3, cox1_pos3, atp8_pos3</i> ) | GTR+G   |
|         | P4: ( <i>atp8_pos1, nad3_pos1, nad6_pos1, atp8_pos2</i> )                                             | GTR+I+G |
|         | P5: ( <i>cox2_pos1, cox1_pos1</i> )                                                                   | GTR+I+G |
|         | P6: ( <i>nad1_pos1, nad5_pos1, nad4L_pos1, nad4_pos1</i> )                                            | GTR+I+G |
|         | P7: ( <i>nad4L_pos2, nad4_pos2, nad5_pos2, nad1_pos2</i> )                                            | GTR+I+G |
|         | P8: ( <i>nad4_pos3, nad1_pos3</i> )                                                                   | GTR+G   |
|         | P9: ( <i>nad6_pos2, nad3_pos2, nad2_pos2</i> )                                                        | GTR+I+G |
|         | P10: ( <i>nad2_pos3</i> )                                                                             | GTR+G   |
|         | P11: ( <i>nad4L_pos3, nad5_pos3</i> )                                                                 | HKY+G   |
| PRT     | P1: ( <i>cytb_pos1, cox3_pos1, atp6_pos1</i> )                                                        | GTR+I+G |
|         | P2: ( <i>cox1_pos2, cytb_pos2, cox3_pos2, cox2_pos2, atp6_pos2</i> )                                  | GTR+I+G |
|         | P3: ( <i>nad6_pos3, atp6_pos3, cox1_pos3, atp8_pos3, cox2_pos3, nad3_pos3, cytb_pos3, cox3_pos3</i> ) | GTR+G   |
|         | P4: ( <i>nad6_pos1, atp8_pos1</i> )                                                                   | GTR+I+G |
|         | P5: ( <i>trnE, atp8_pos2, trnR</i> )                                                                  | F81+I+G |
|         | P6: ( <i>cox2_pos1, cox1_pos1</i> )                                                                   | GTR+I+G |
|         | P7: ( <i>nad1_pos1, nad5_pos1, nad4_pos1, nad4L_pos1</i> )                                            | GTR+I+G |
|         | P8: ( <i>nad4L_pos2, nad4_pos2, nad5_pos2, nad1_pos2</i> )                                            | GTR+I+G |
|         | P9: ( <i>nad1_pos3, nad4_pos3</i> )                                                                   | GTR+G   |
|         | P10: ( <i>trnS2, trnT, trnI, trnS1, nad2_pos1, nad3_pos1, trnA</i> )                                  | GTR+I+G |
|         | P11: ( <i>nad6_pos2, trnK, nad2_pos2, nad3_pos2</i> )                                                 | GTR+I+G |
| 12PRT   | P12: ( <i>nad2_pos3</i> )                                                                             | GTR+G   |
|         | P13: ( <i>nad4L_pos3, nad5_pos3</i> )                                                                 | HKY+G   |
|         | P14: ( <i>rrnL, trnV, rrnS, trnY</i> )                                                                | GTR+I+G |
|         | P15: ( <i>trnQ, trnC, trnL1</i> )                                                                     | HKY+G   |
|         | P16: ( <i>trnD, trnH, trnF, trnP</i> )                                                                | HKY+I+G |
|         | P17: ( <i>trnG, trnW, trnM, trnL2, trnN</i> )                                                         | HKY+I+G |
|         | P1: ( <i>atp6, cox3, cytb, cox2, trnL2</i> )                                                          | GTR+I+G |
|         | P2: ( <i>nad6, atp8</i> )                                                                             | GTR+I+G |
|         | P3: ( <i>cox1</i> )                                                                                   | GTR+I+G |
|         | P4: ( <i>nad4, nad1, nad5</i> )                                                                       | GTR+I+G |
|         | P5: ( <i>trnS1, nad2, nad3</i> )                                                                      | GTR+I+G |
|         | P6: ( <i>rrnL, trnV, trnY, nad4L, rrnS</i> )                                                          | GTR+I+G |
|         | P7: ( <i>trnR, trnN, trnA, trnS2, trnI, trnT, trnE, trnG</i> )                                        | GTR+I+G |
|         | P8: ( <i>trnW, trnM, trnK, trnC, trnQ, trnL1</i> )                                                    | HKY+G   |
|         | P9: ( <i>trnD, trnH, trnF, trnP</i> )                                                                 | HKY+I+G |



**Table S4.** Best partitioning schemes and models based on different datasets for ML analysis.

| Datasets | Partitioning scheme                                                         | Models    |
|----------|-----------------------------------------------------------------------------|-----------|
| PCGs     | P1: ( <i>cytb_pos1, atp6_pos1, cox3_pos1</i> )                              | GTR+I+G   |
|          | P2: ( <i>cox3_pos2, cox2_pos2, atp6_pos2, cytb_pos2, cox1_pos2</i> )        | TVM+I+G   |
|          | P3: ( <i>nad6_pos3, atp6_pos3, cox2_pos3, cytb_pos3</i> )                   | TRN+G     |
|          | P4: ( <i>atp8_pos2, atp8_pos1</i> )                                         | K81UF+I+G |
|          | P5: ( <i>nad2_pos3, cox1_pos3, atp8_pos3</i> )                              | TIM+G     |
|          | P6: ( <i>cox1_pos1</i> )                                                    | GTR+G     |
|          | P7: ( <i>cox2_pos1</i> )                                                    | TRN+I+G   |
|          | P8: ( <i>cox3_pos3, nad3_pos3</i> )                                         | TRN+G     |
|          | P9: ( <i>nad5_pos1, nad1_pos1, nad4_pos1, nad4L_pos1</i> )                  | GTR+I+G   |
|          | P10: ( <i>nad4L_pos2, nad4_pos2, nad5_pos2, nad1_pos2</i> )                 | GTR+I+G   |
|          | P11: ( <i>nad1_pos3, nad4_pos3</i> )                                        | GTR+G     |
|          | P12: ( <i>nad6_pos1, nad3_pos1, nad2_pos1</i> )                             | GTR+I+G   |
|          | P13: ( <i>nad6_pos2, nad3_pos2, nad2_pos2</i> )                             | TVM+I+G   |
|          | P14: ( <i>nad4L_pos3, nad5_pos3</i> )                                       | K81UF+I+G |
| PRT      | P1: ( <i>cytb_pos1, cox3_pos1, atp6_pos1</i> )                              | GTR+I+G   |
|          | P2: ( <i>cox2_pos2, atp6_pos2, cox3_pos2, trnL2, cytb_pos2, cox1_pos2</i> ) | TVM+I+G   |
|          | P3: ( <i>nad6_pos3, atp8_pos3, cox2_pos3, atp6_pos3</i> )                   | TRN+G     |
|          | P4: ( <i>atp8_pos1, atp8_pos2, trnE</i> )                                   | K81UF+I+G |
|          | P5: ( <i>cox1_pos1</i> )                                                    | GTR+G     |
|          | P6: ( <i>nad2_pos3, cox1_pos3</i> )                                         | TIM+G     |
|          | P7: ( <i>cox2_pos1</i> )                                                    | TRN+I+G   |
|          | P8: ( <i>nad3_pos3, cox3_pos3, cytb_pos3</i> )                              | TRN+I+G   |
|          | P9: ( <i>nad5_pos1, nad1_pos1, nad4_pos1, nad4L_pos1</i> )                  | GTR+I+G   |
|          | P10: ( <i>nad4L_pos2, nad4_pos2, nad5_pos2, nad1_pos2</i> )                 | GTR+I+G   |
|          | P11: ( <i>nad4L_pos3, nad5_pos3, nad1_pos3, nad4_pos3</i> )                 | TVM+I+G   |
|          | P12: ( <i>nad6_pos1, nad2_pos1, trnS1, nad3_pos1, trnA, trnT</i> )          | GTR+I+G   |
|          | P13: ( <i>nad6_pos2, nad3_pos2, nad2_pos2</i> )                             | TVM+I+G   |
|          | P14: ( <i>trnH, trnF, trnP, trnS2, rrnL, trnI, trnY, trnV, rrnS</i> )       | GTR+I+G   |
| 12PRT    | P15: ( <i>trnC, trnK, trnQ, trnL1</i> )                                     | HKY+G     |
|          | P16: ( <i>trnW, trnN, trnM, trnG, trnD, trnR</i> )                          | K81UF+I+G |
|          | P1: ( <i>atp6, cox3, cytb, cox2, trnL2</i> )                                | GTR+I+G   |
|          | P2: ( <i>nad6, atp8</i> )                                                   | GTR+I+G   |
|          | P3: ( <i>cox1</i> )                                                         | GTR+I+G   |
|          | P4: ( <i>nad4, nad1, nad5</i> )                                             | TIM+I+G   |
|          | P5: ( <i>trnS1, trnA, nad3, nad2, trnT</i> )                                | TIM+I+G   |
|          | P6: ( <i>trnH, trnP, rrnF, rrnL, trnI, trnY, trnV, rrnS, nad4L</i> )        | GTR+I+G   |
|          | P7: ( <i>trnQ, trnL1, trnW, trnM, trnK, trnC</i> )                          | HKY+G     |



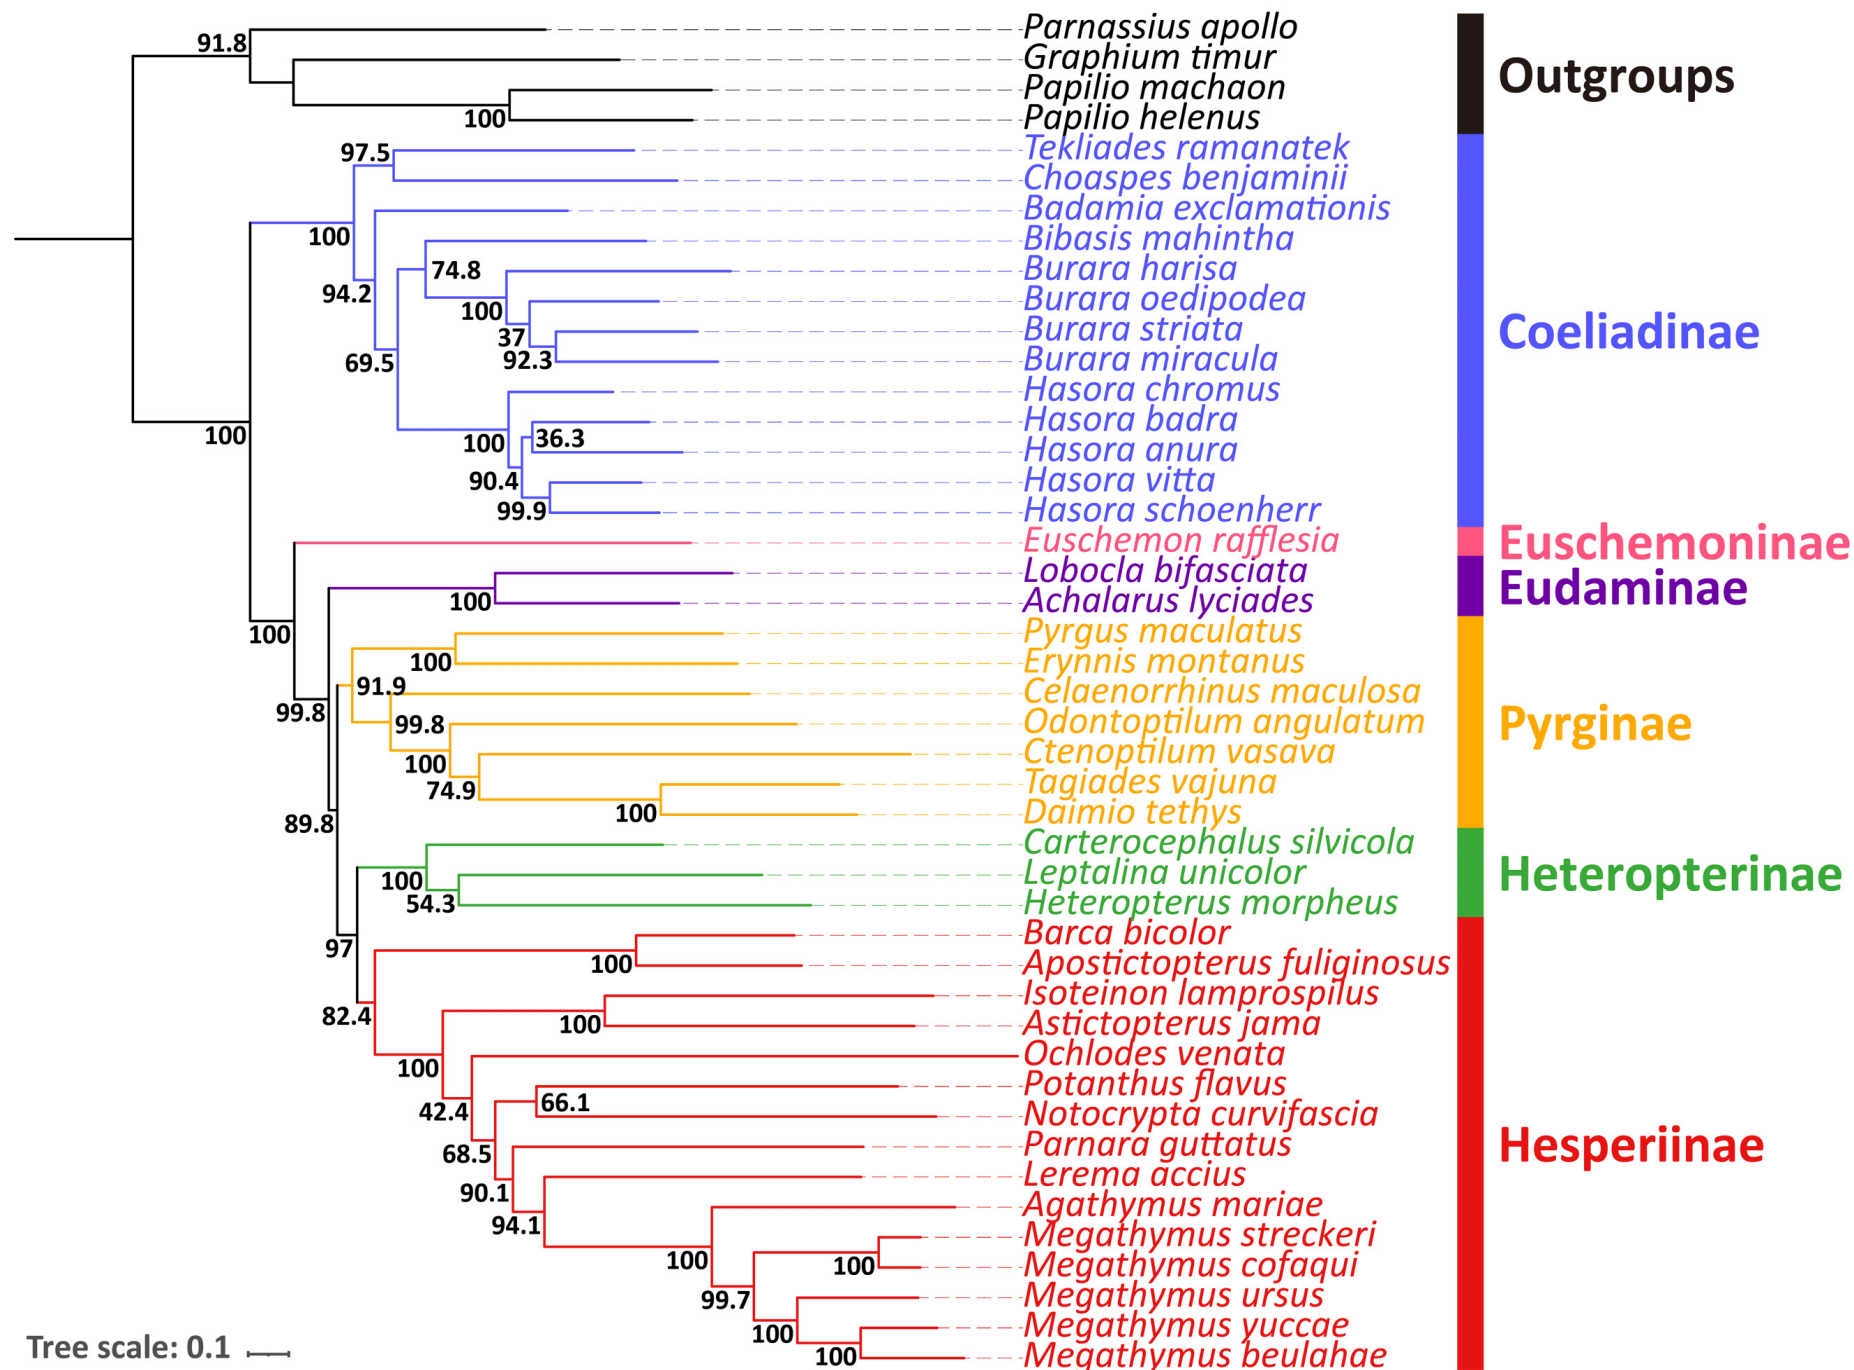

**Figure S1.** Phylogenetic tree inferred by ML method based on PRT dataset. Numbers on nodes are the bootstrap support values (BS).

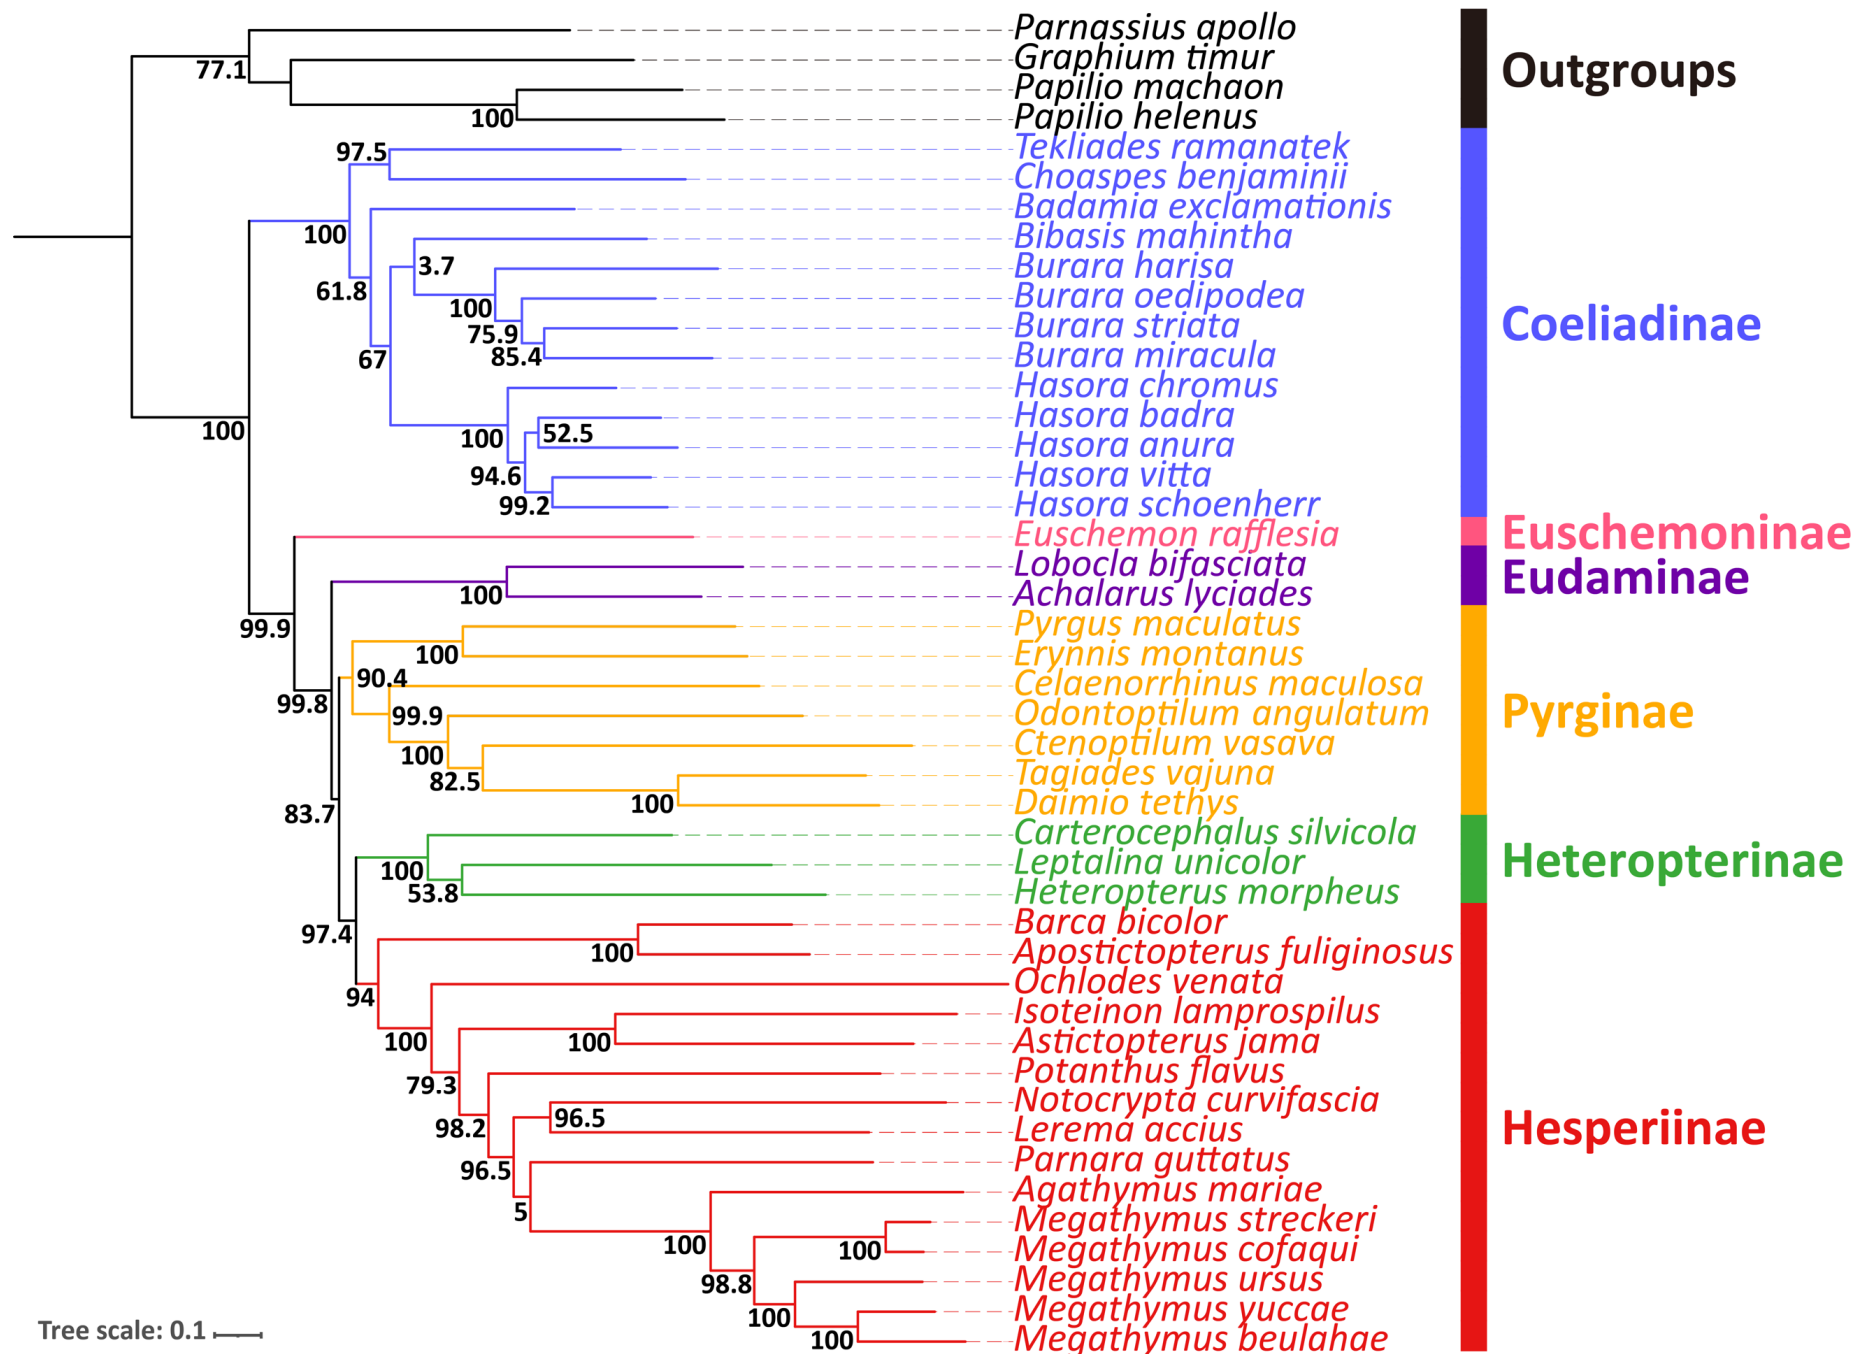

**Figure S2.** Phylogenetic tree inferred by ML method based on PCG dataset. Numbers on nodes are the bootstrap support values (BS).

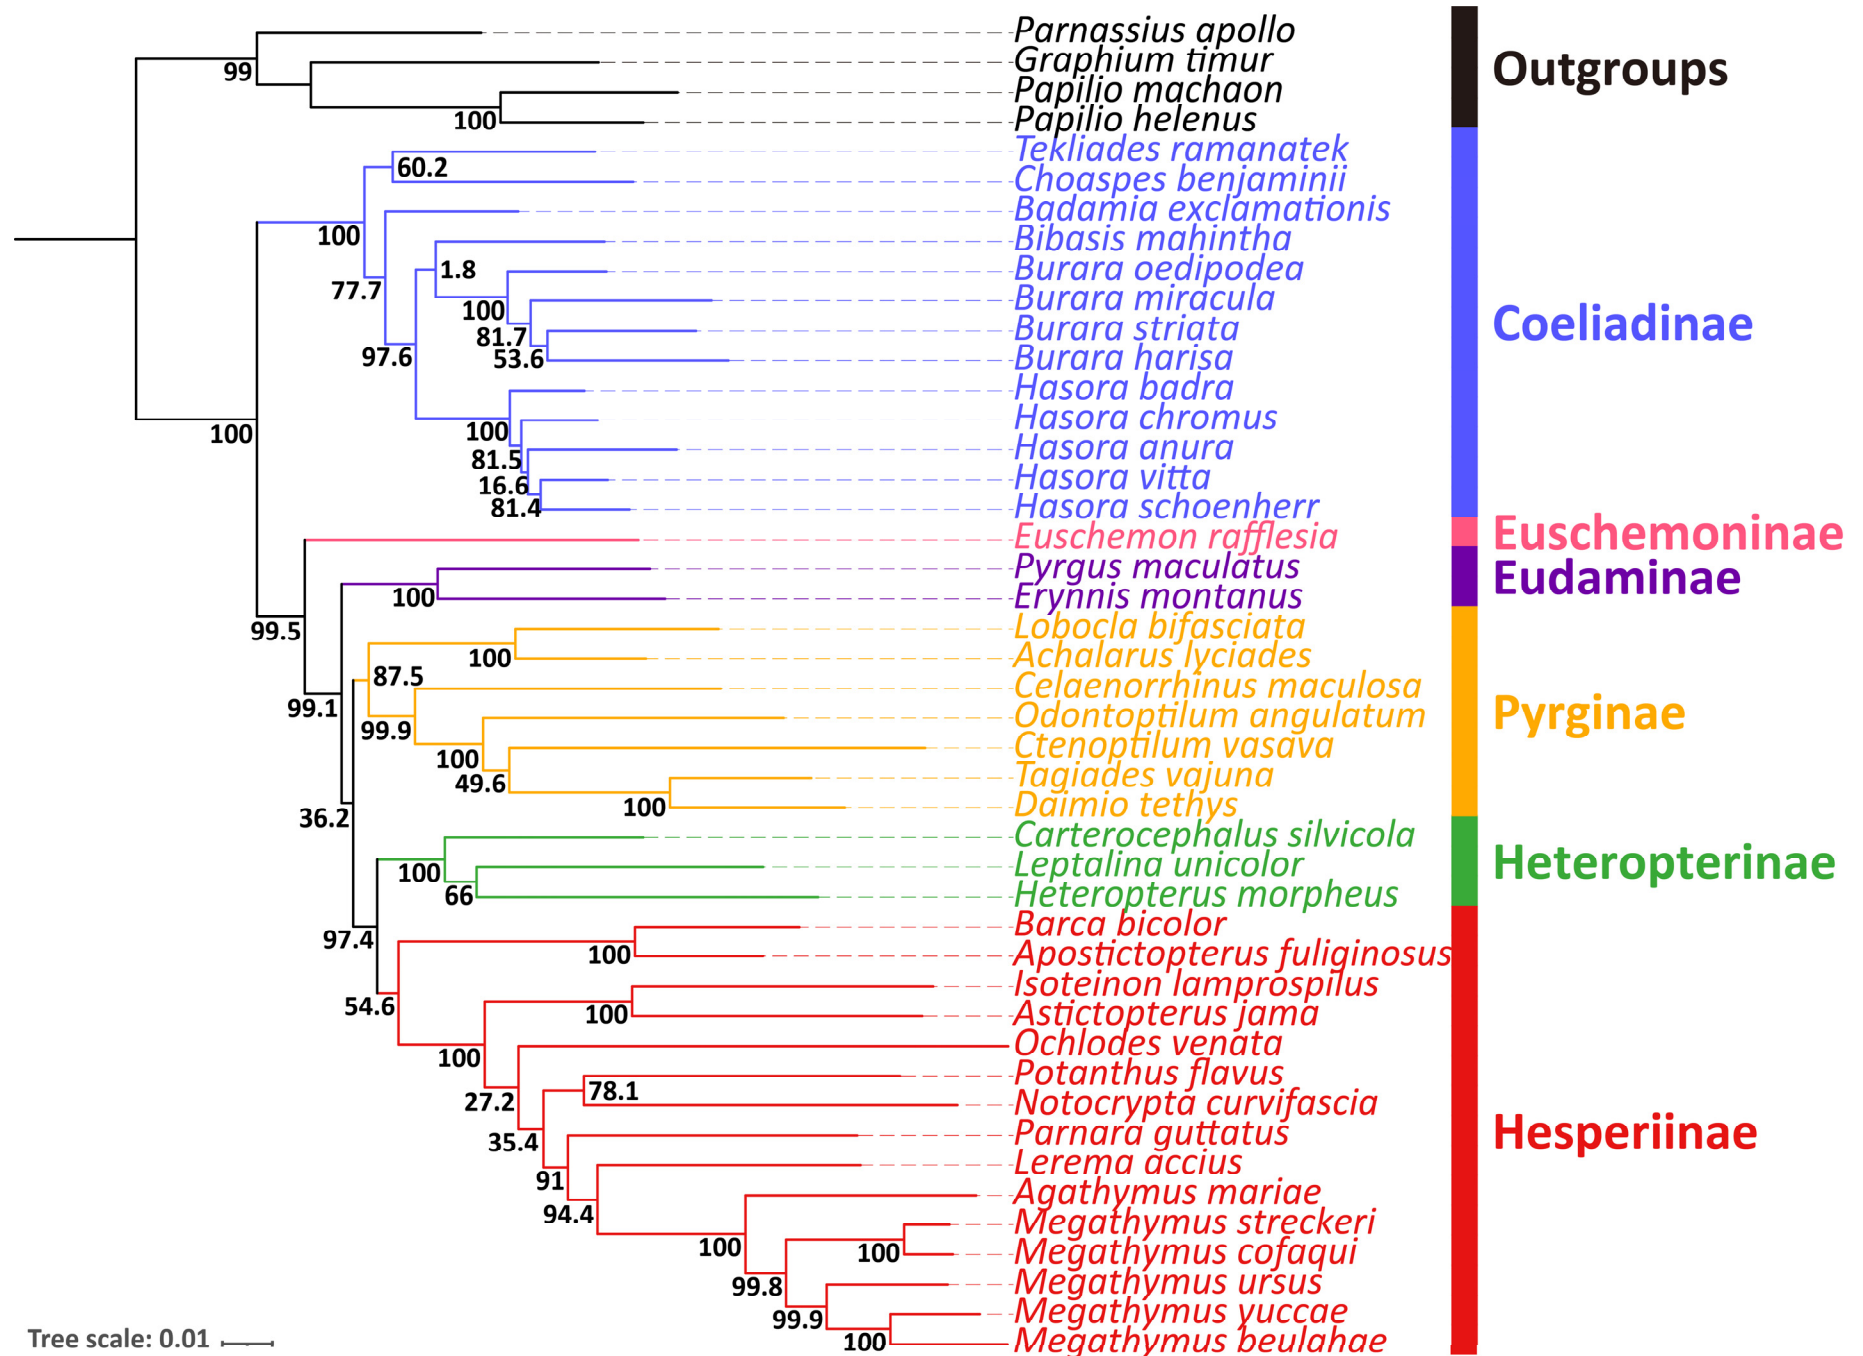

Figure S3. Phylogenetic tree inferred by ML method based on 12PRT dataset. Numbers on nodes are the bootstrap support values (BS).

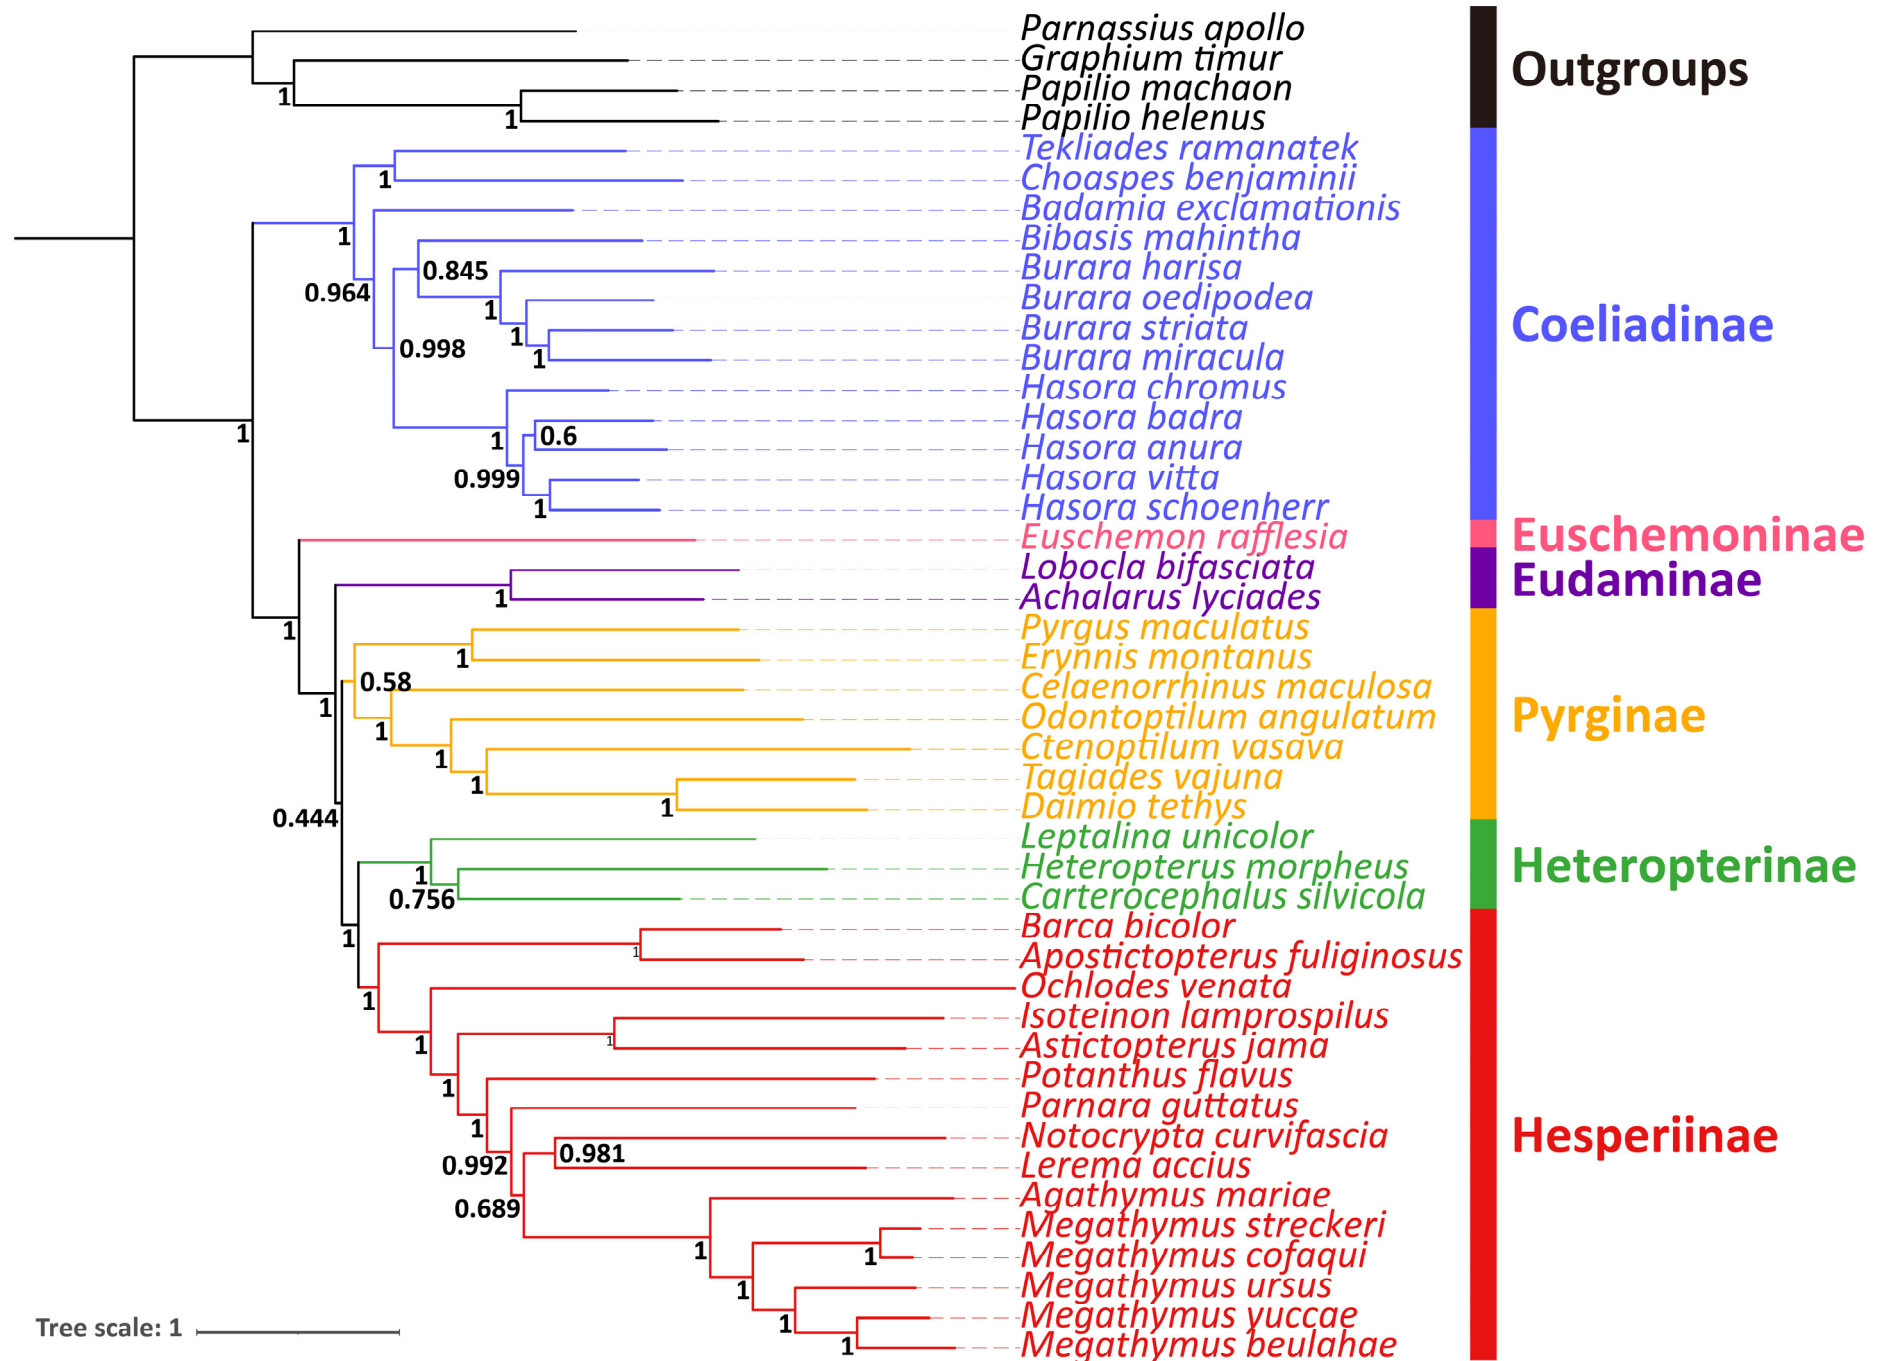

Figure S4. Phylogenetic tree inferred by BI method based on PCG dataset. Numbers on nodes are the posterior probabilities (PP).



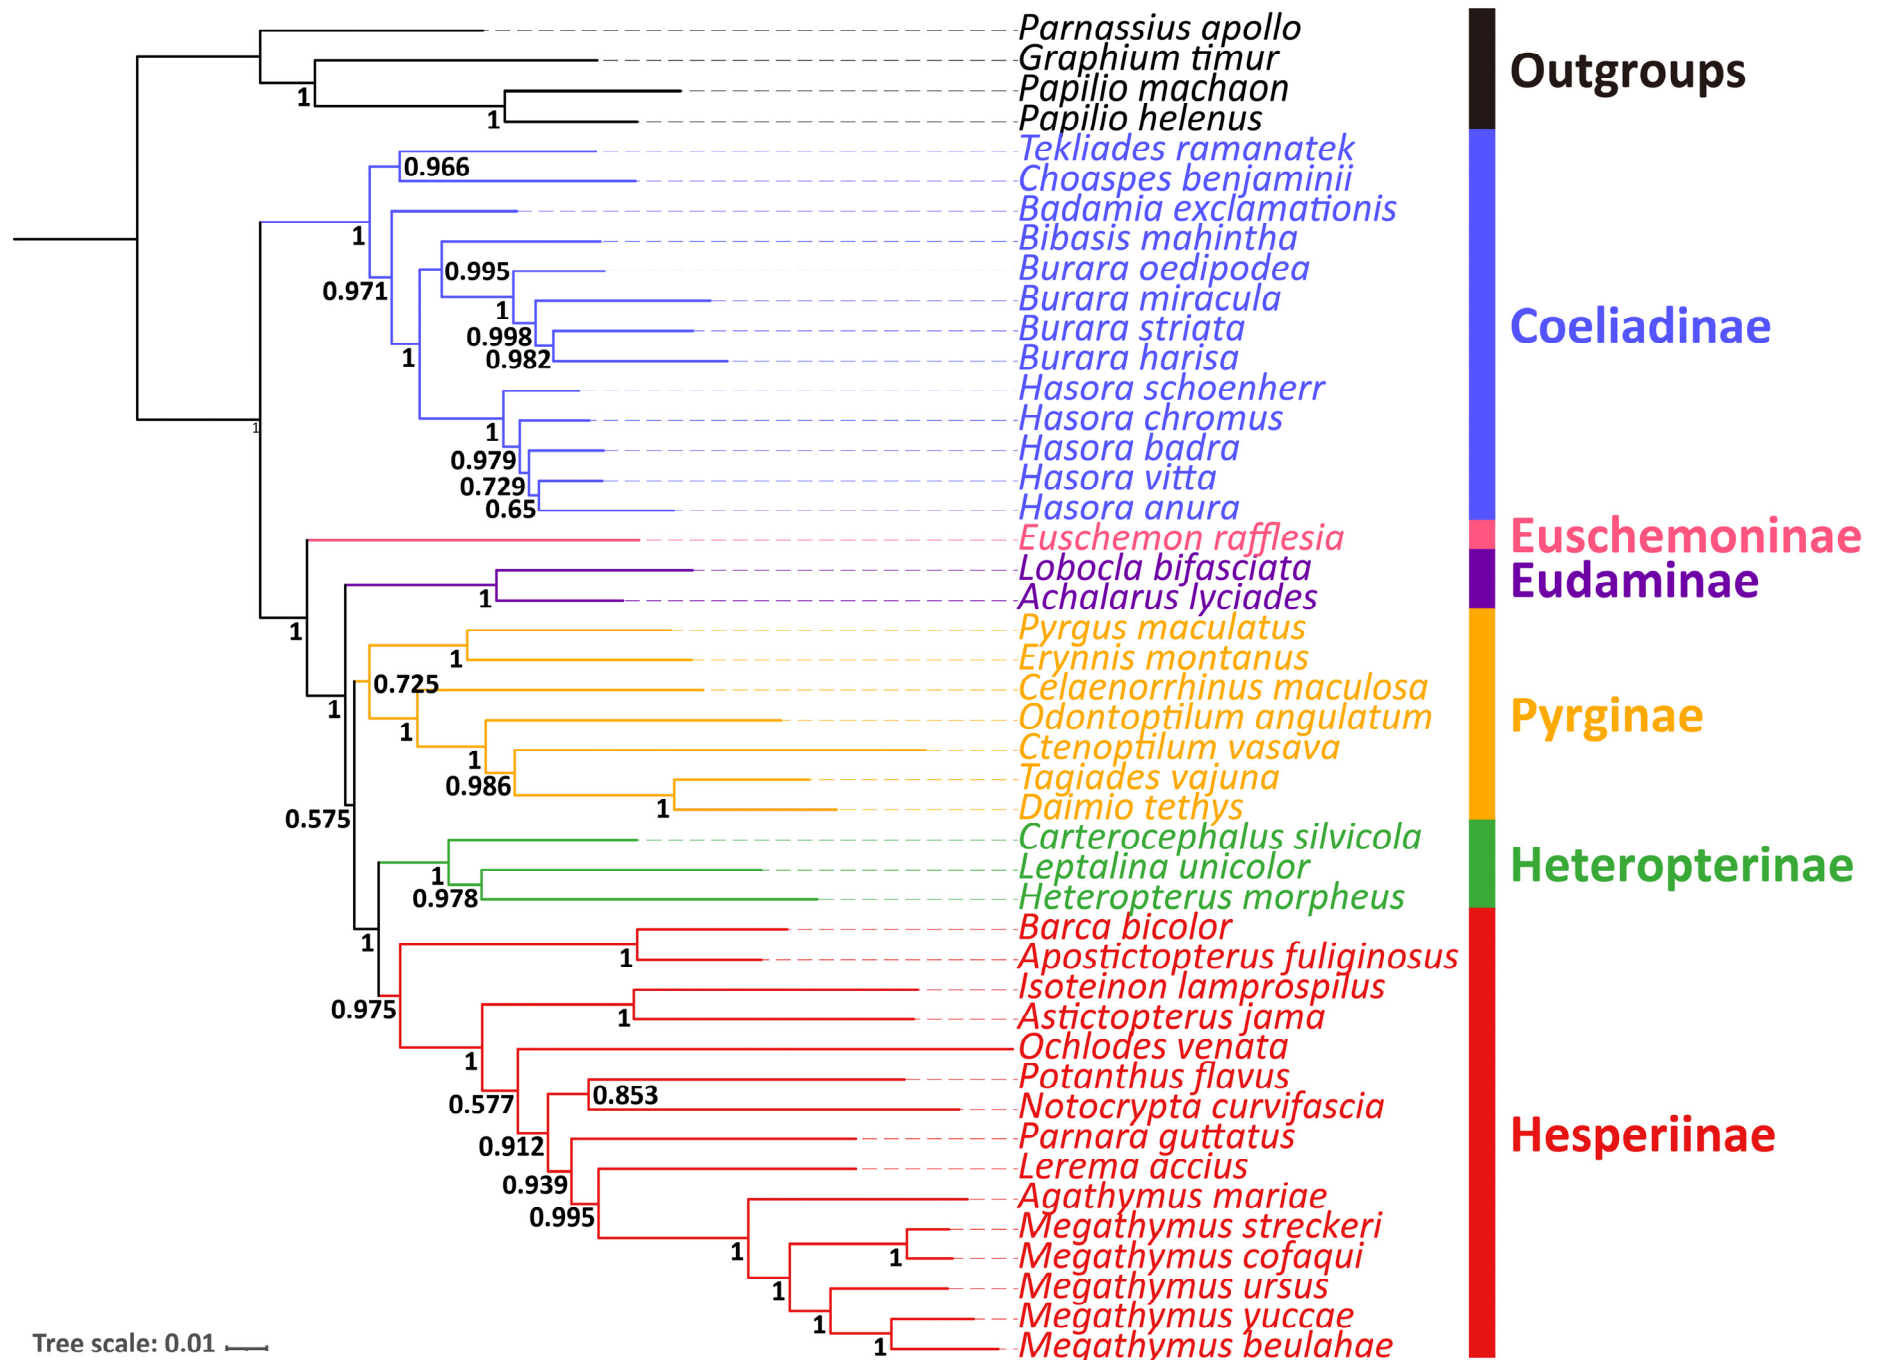

Figure S5. Phylogenetic tree inferred by BI method based on 12PRT dataset. Numbers on nodes are the posterior probabilities (PP).

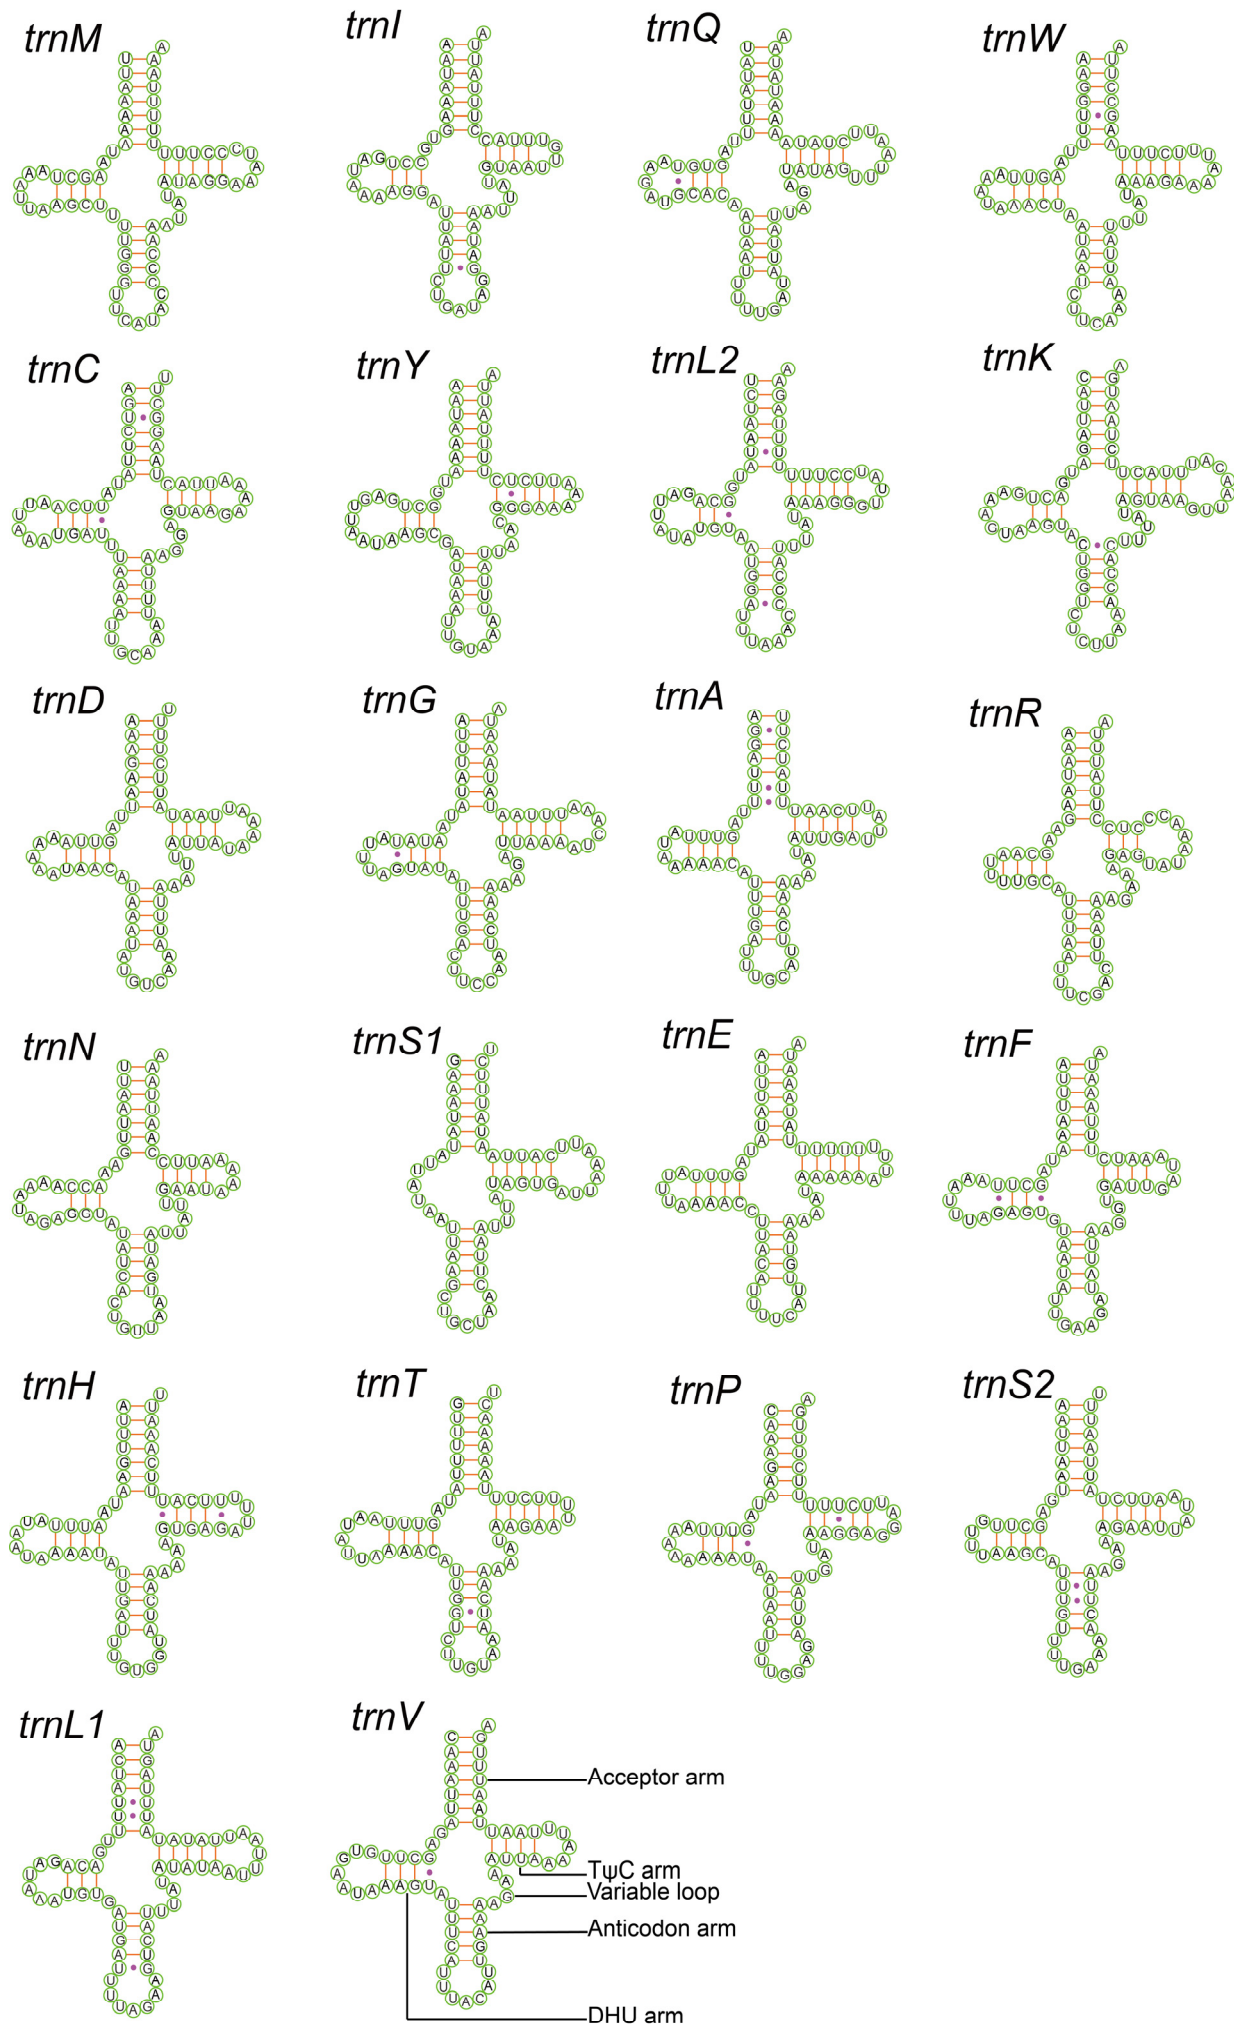

Figure S6. Predicted secondary cloverleaf structure of tRNA of *H. schoenherr*.



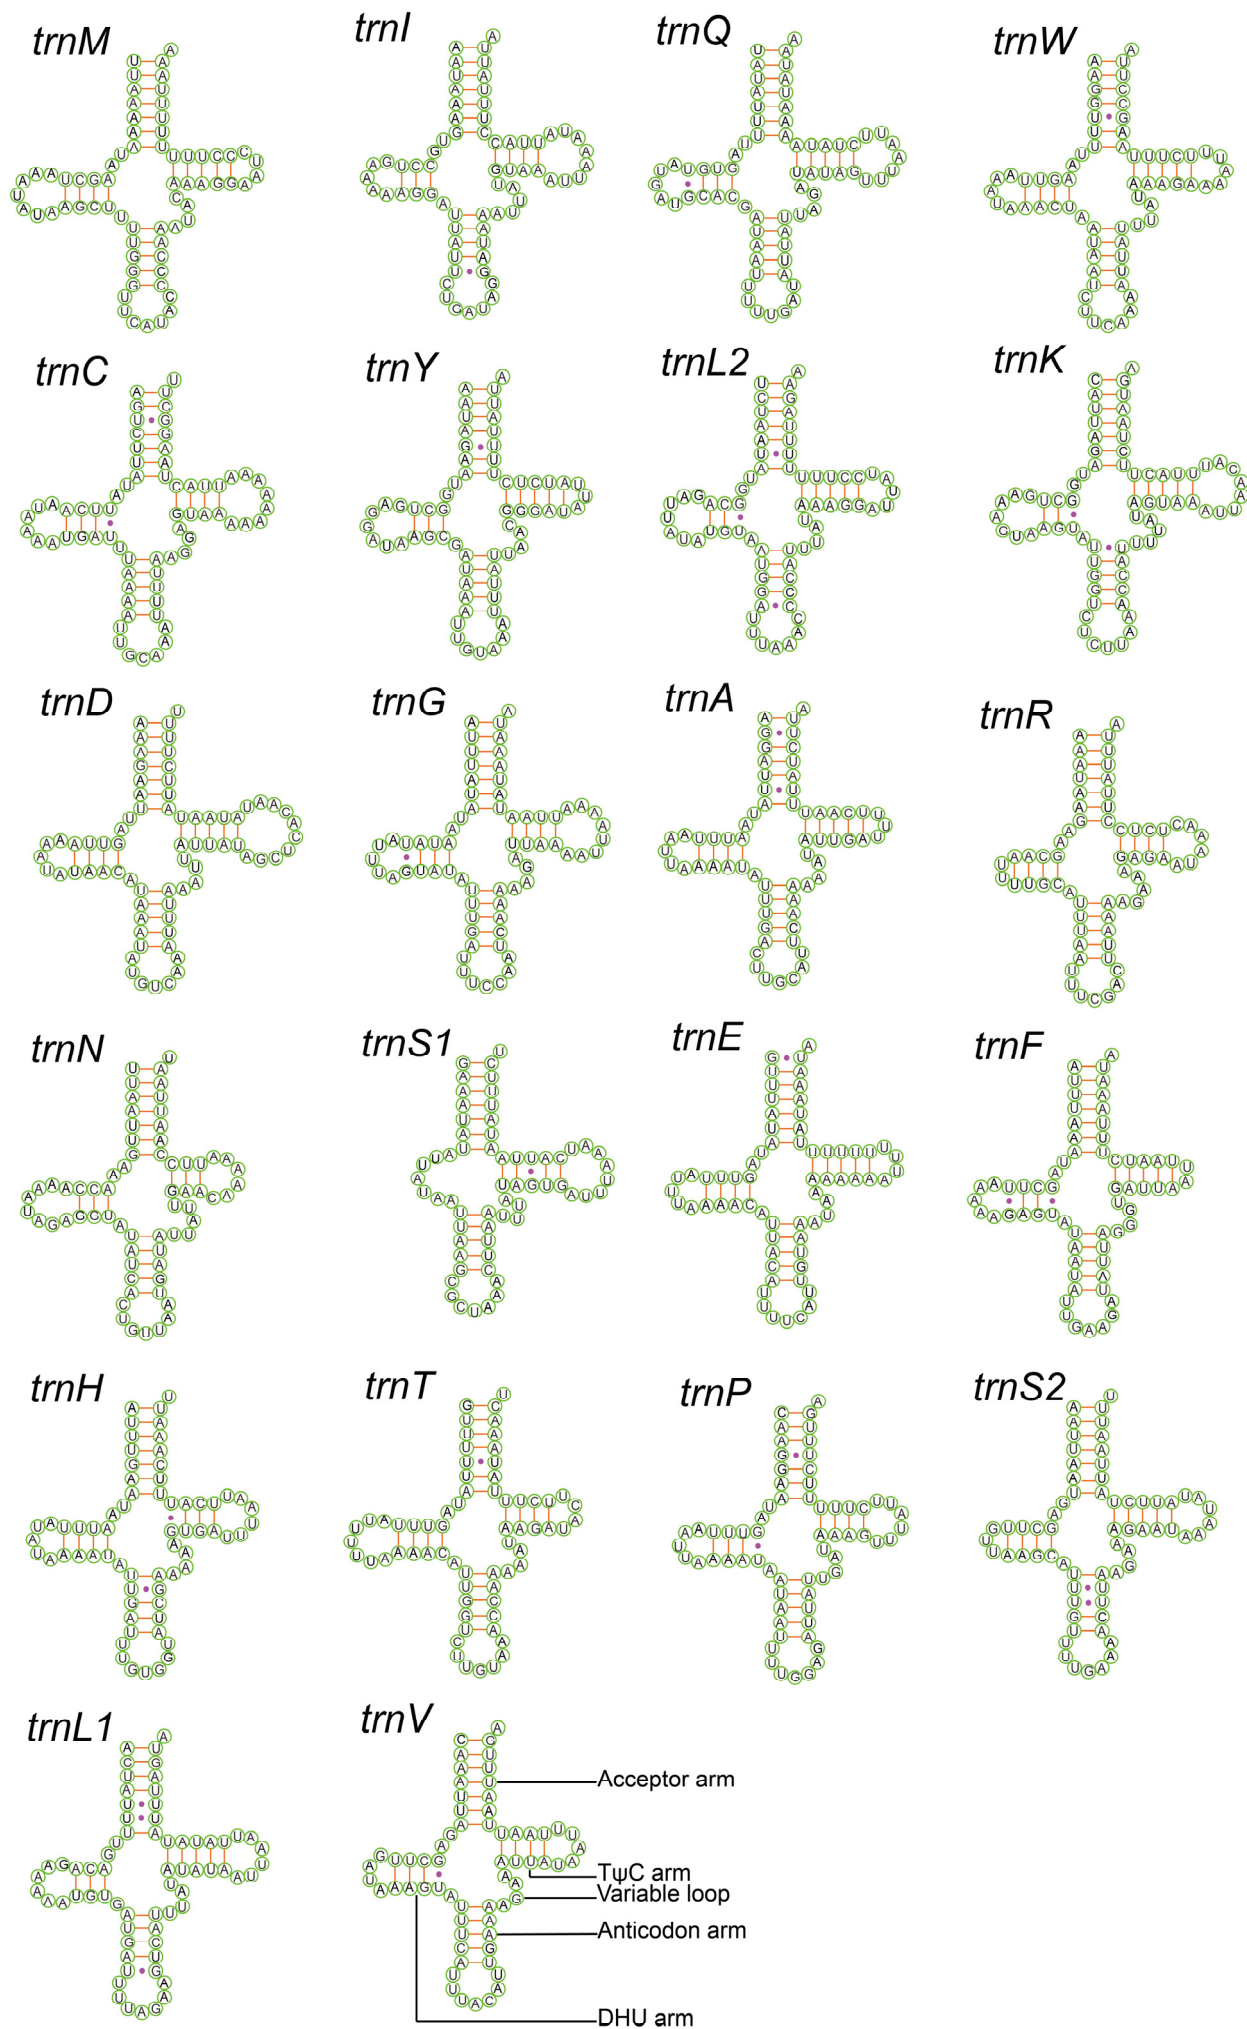

**Figure S7.** Predicted secondary cloverleaf structure of tRNA of *B. miracula*.

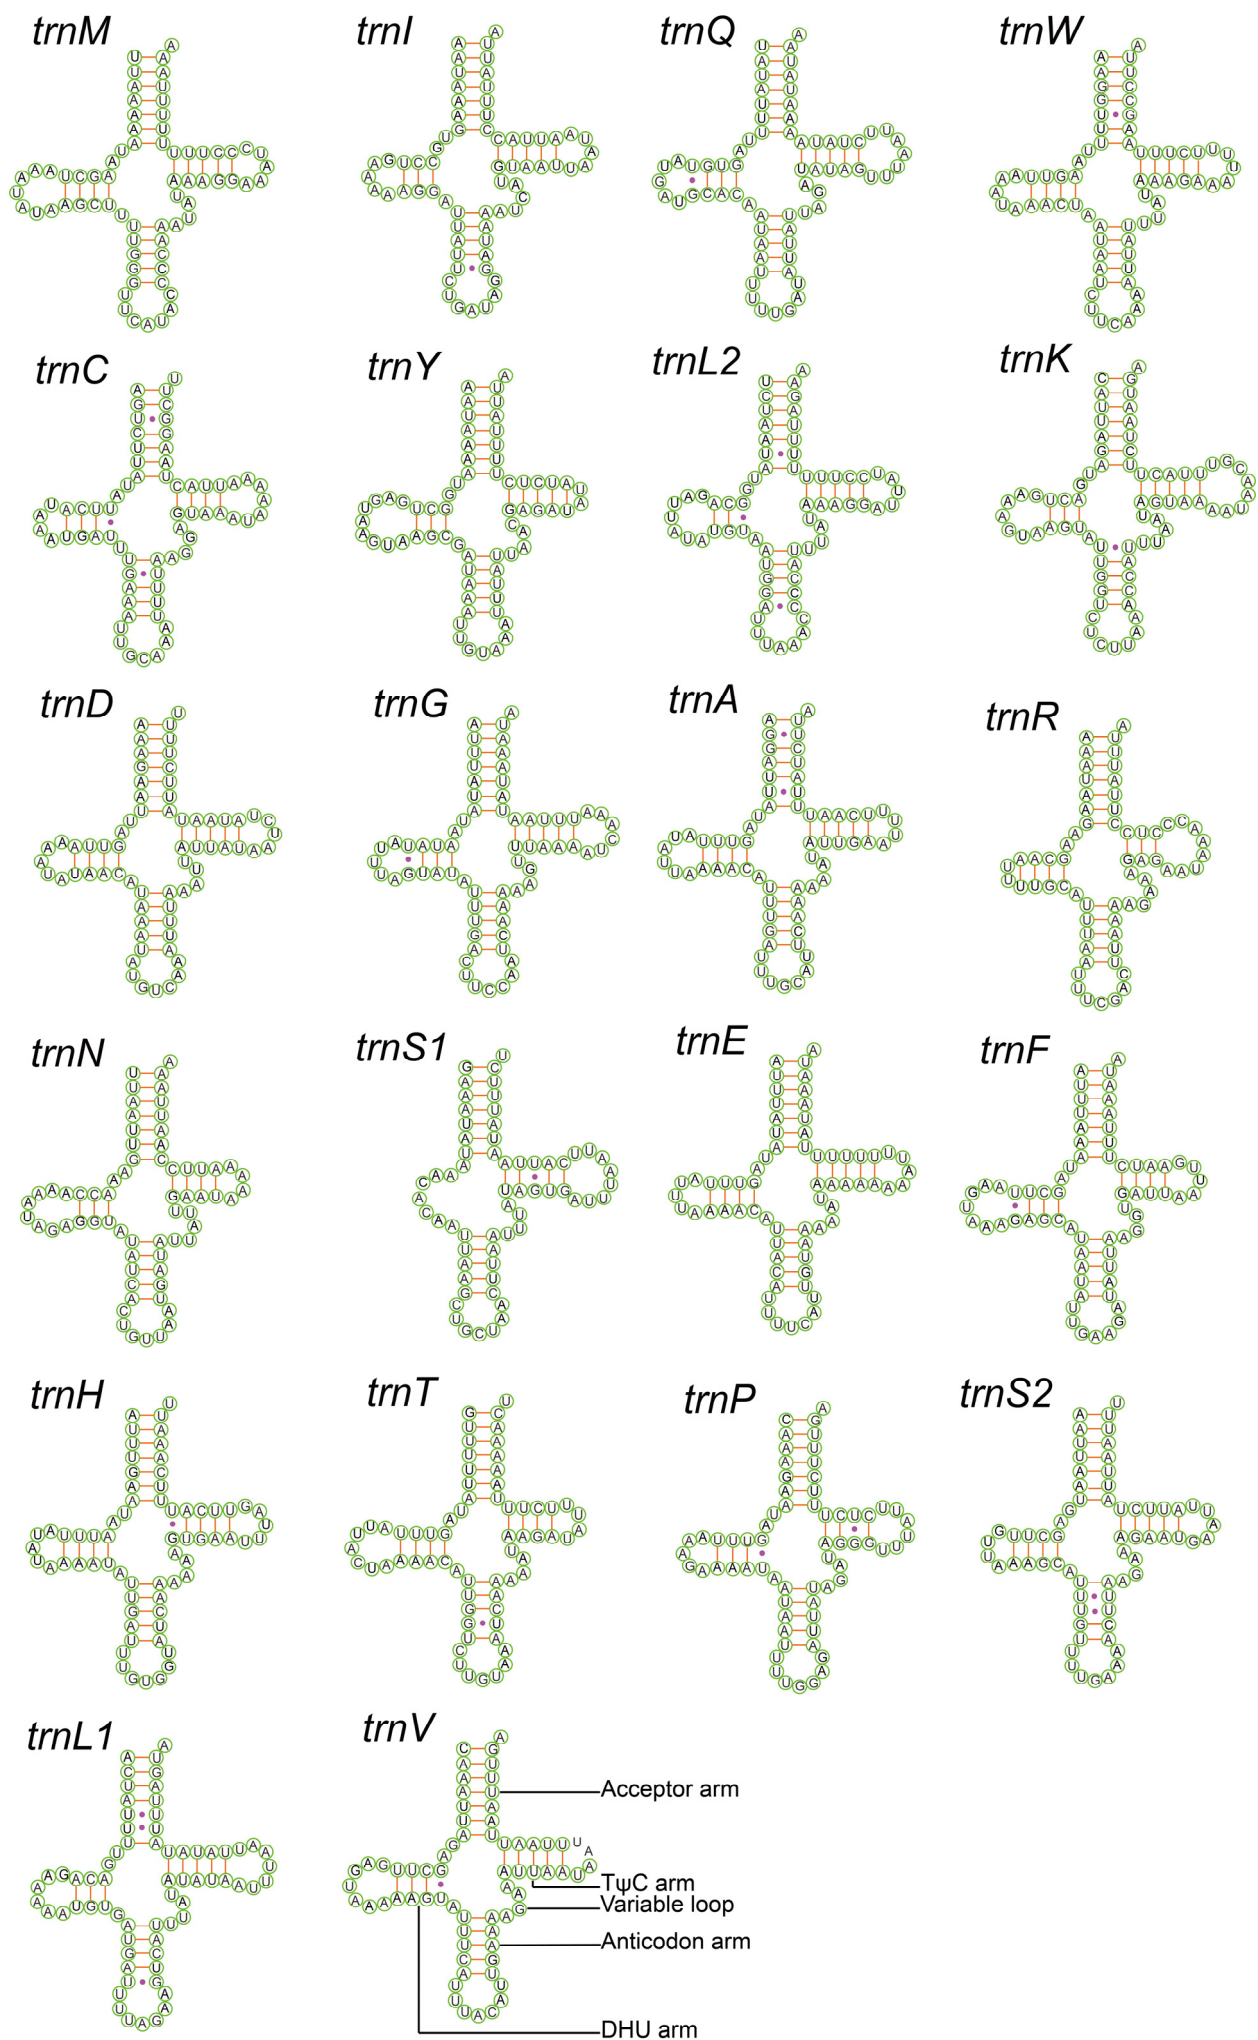

**Figure S8.** Predicted secondary cloverleaf structure of tRNA of *B. oedipodea*.

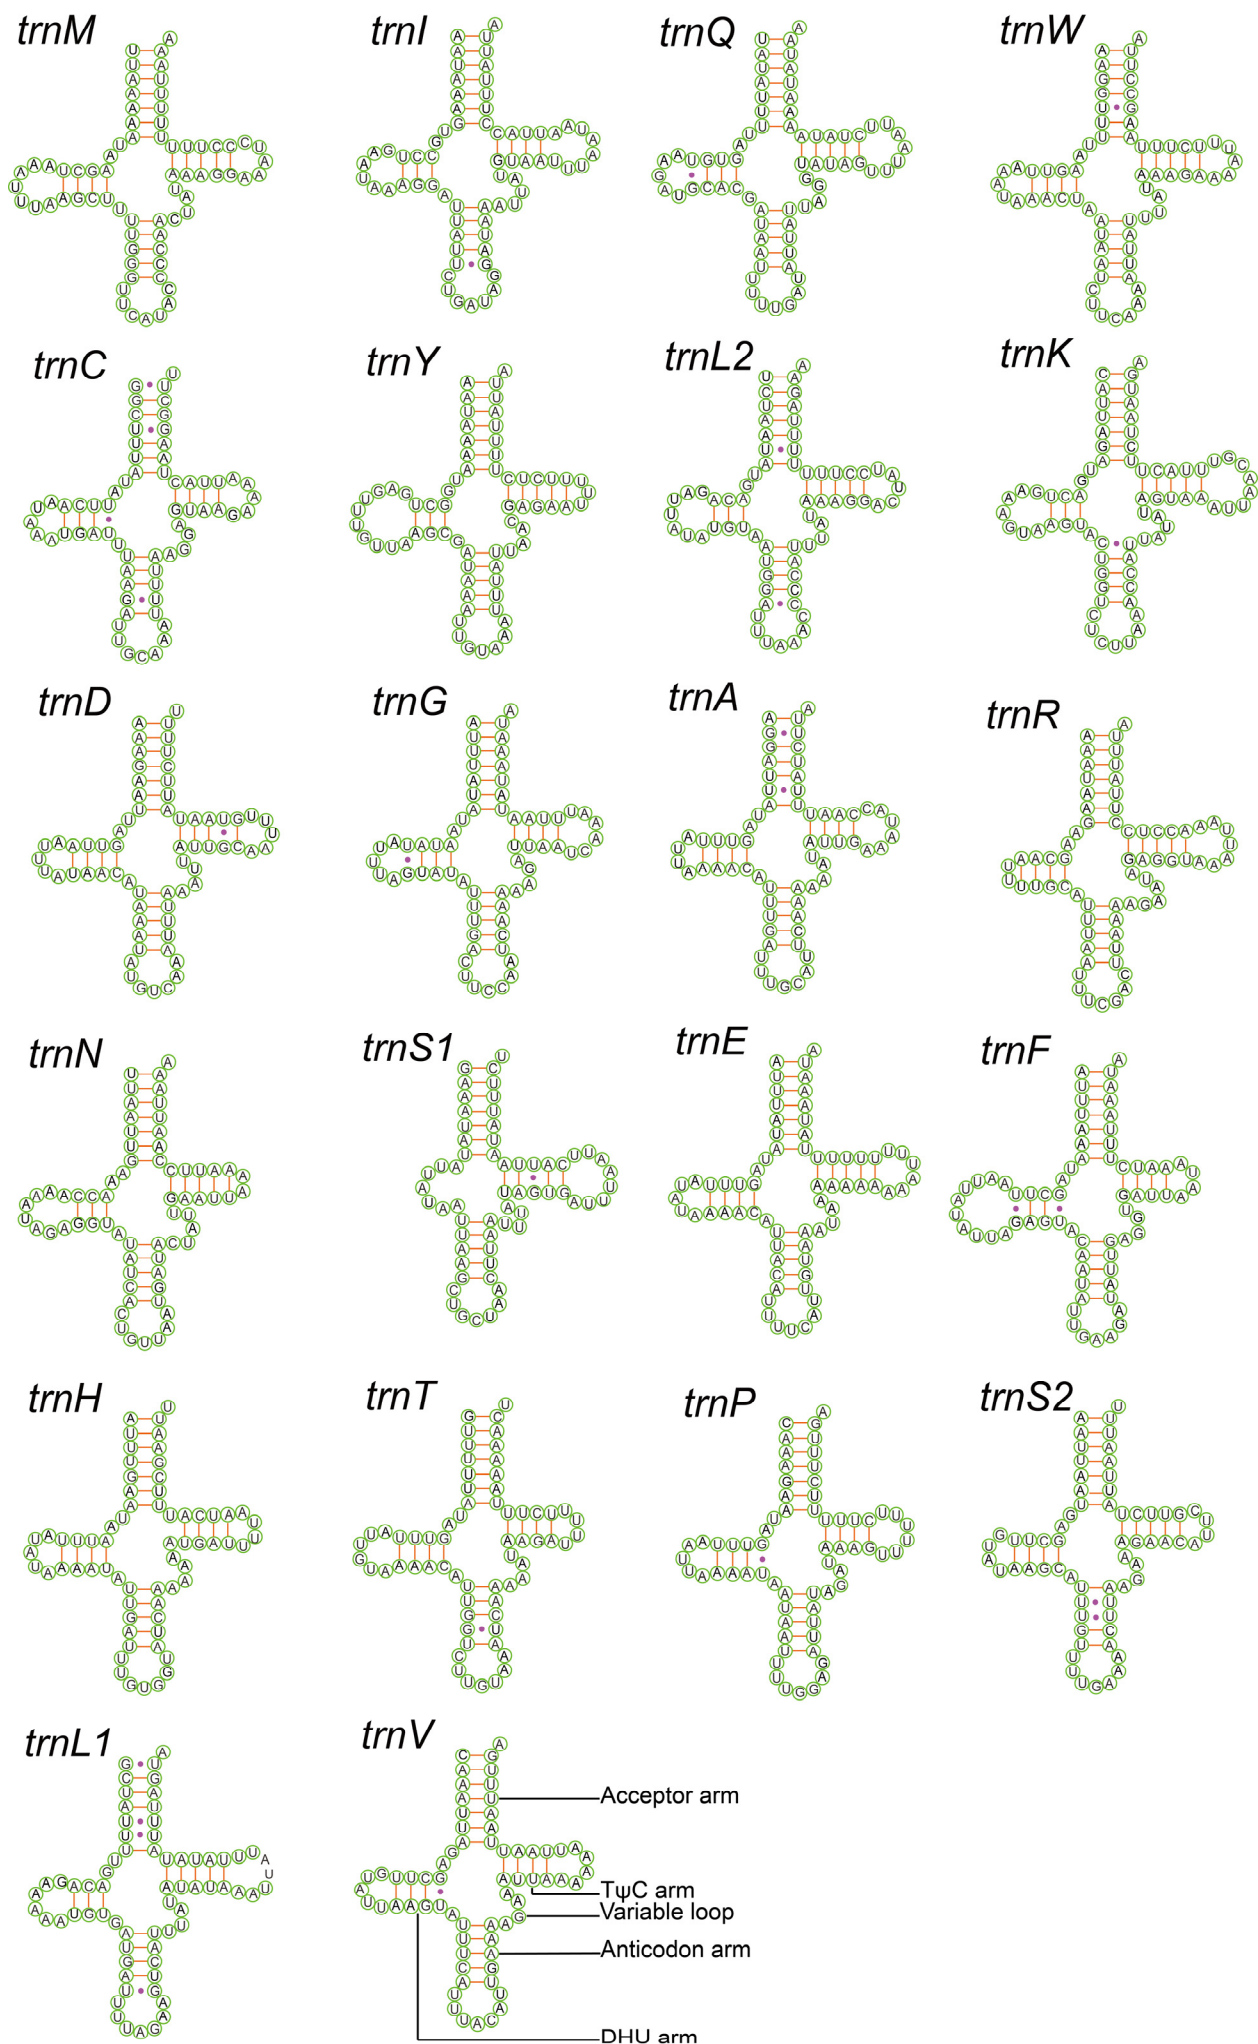

**Figure S9.** Predicted secondary cloverleaf structure of tRNA of *B. harisa*.



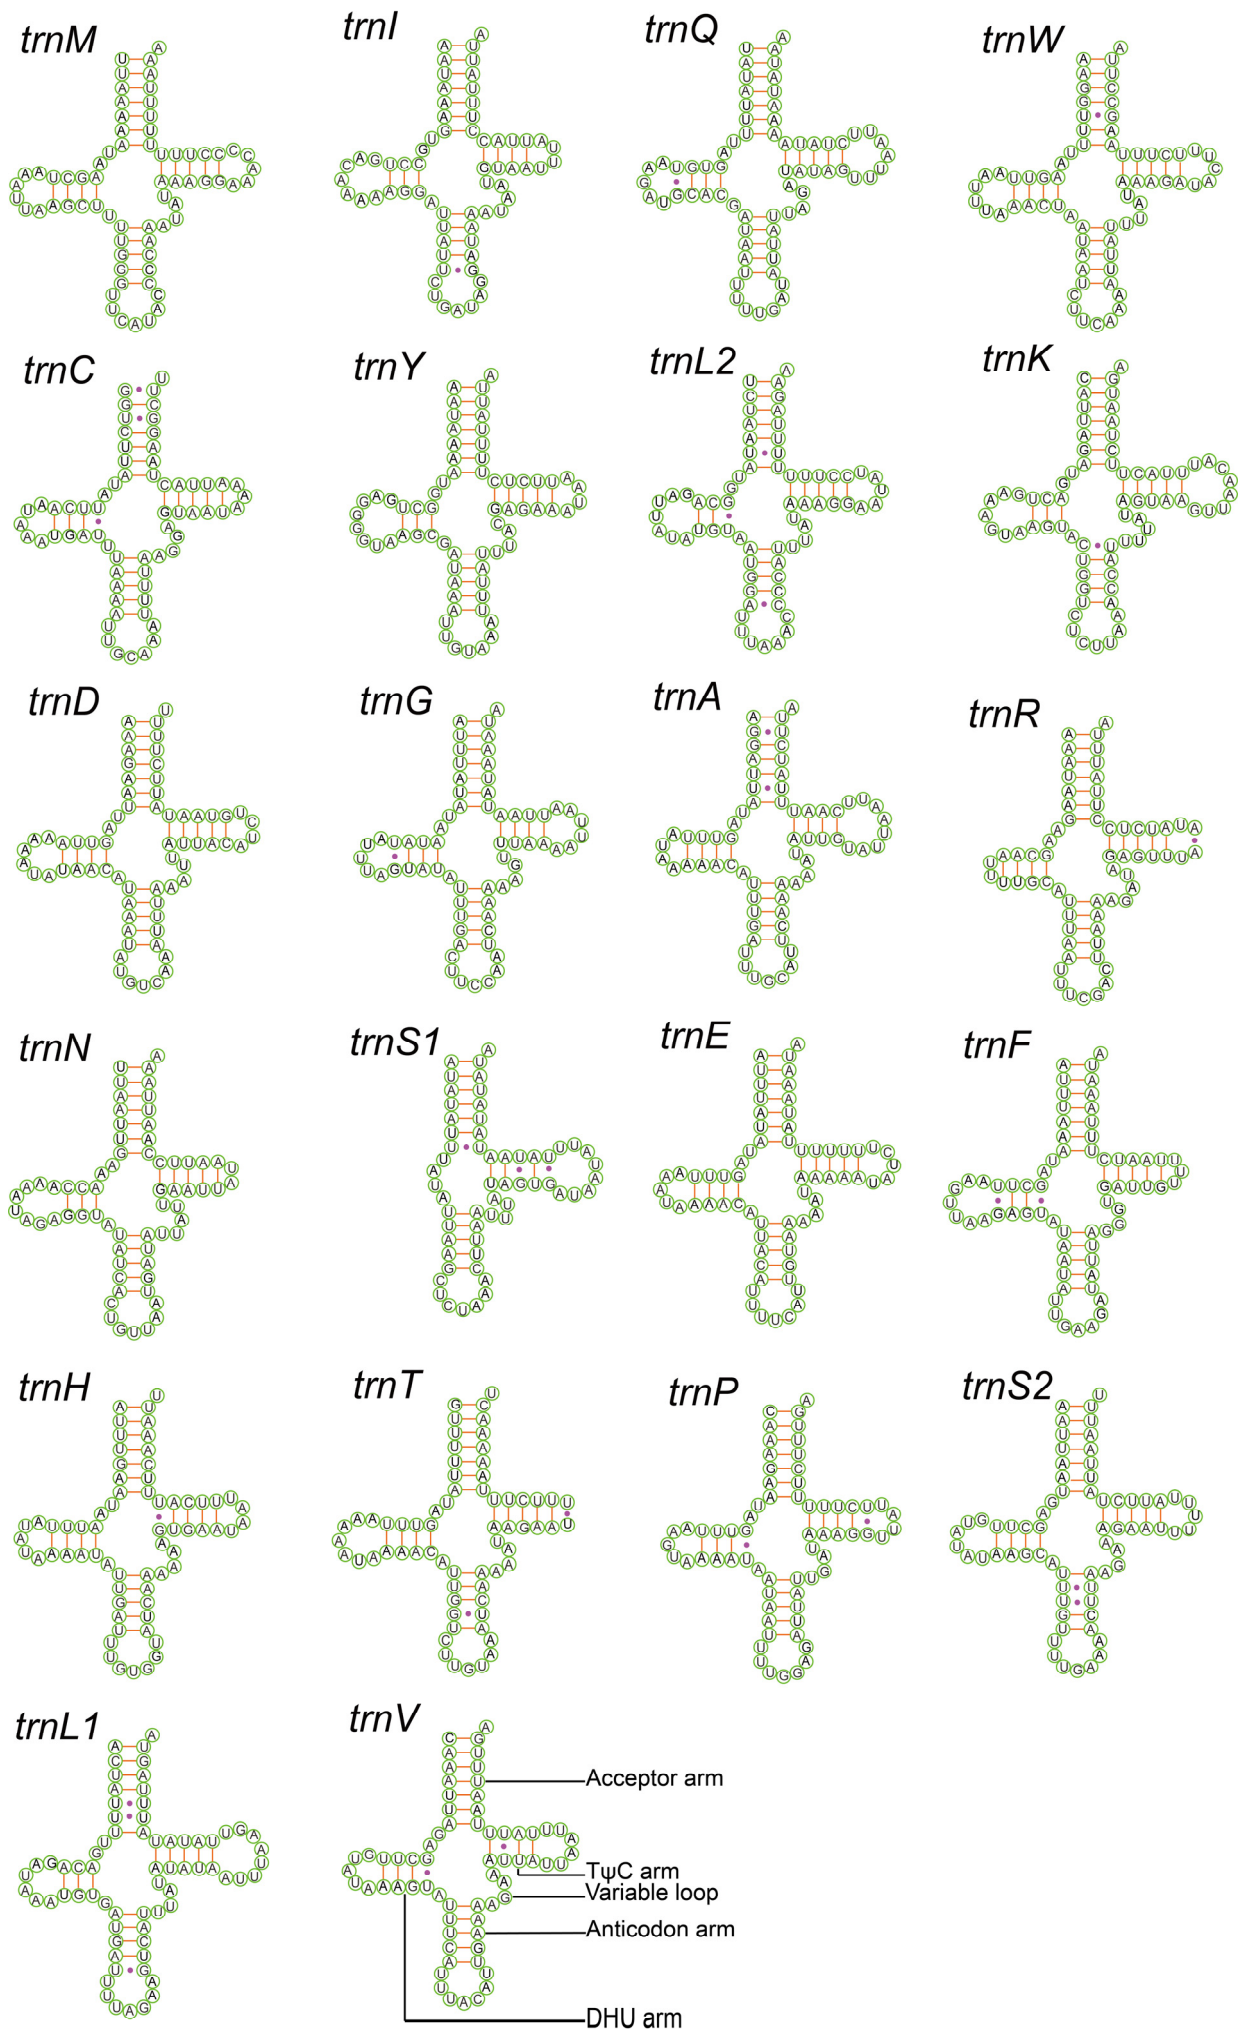

**Figure S10.** Predicted secondary cloverleaf structure of tRNA of *B. exclamationis*.
